# Supplementary material for: Optimizing PCR Detection of West Nile Virus from Body Fluid Specimens to Delineate Natural History in an Infected Human Cohort
Source: PubMed Central journal article supplement (PMC6514913; doi:10.3390/ijms20081934), 2019-04-19
Supplement: ijms-20-01934-s001.pdf [file ijms-20-01934-s001.pdf]

**Supplementary Materials**

**Optimizing PCR Detection of West Nile Virus from Body Fluid Specimens to Delineate Natural History in an Infected Human Cohort**

**Table S1.** Individual and average (expected) Ct values and respective concentrations of WNV RNA generated by repeated testing of the spiked reference control replicates.

| Replicates | Set 1 |          | Set 2 |          | Set 3 |          | Average |          | SD  |        |
|------------|-------|----------|-------|----------|-------|----------|---------|----------|-----|--------|
|            | Ct    | cp/μl    | Ct    | cp/μl    | Ct    | cp/μl    | Ct      | cp/μl    | Ct  | cp/μl  |
| LO 1       | 32.2  | 9.1      | 32.4  | 8.1      | 32.4  | 8.0      | 32.4    | 8.2      | 0.1 | 0.5    |
| LO 2       | 32.3  | 8.6      | 32.4  | 7.6      | 32.3  | 8.8      |         |          |     |        |
| LO 3       | 32.4  | 8.2      | 32.4  | 8.0      | 32.5  | 7.6      |         |          |     |        |
| MED 1      | 26.2  | 646.0    | 26.5  | 497.3    | 26.4  | 538.3    | 26.4    | 571.6    | 0.1 | 56.0   |
| MED 2      | 26.1  | 659.1    | 26.3  | 578.5    | 26.4  | 563.0    |         |          |     |        |
| MED 3      | 26.3  | 604.9    | 26.4  | 541.6    | 26.5  | 515.9    |         |          |     |        |
| HI 1       | 20.8  | 29,560.3 | 21.1  | 24,108.8 | 21.1  | 22,248.6 | 21.0    | 25,622.1 | 0.2 | 3181.2 |
| HI 2       | 20.7  | 30,088.5 | 21.0  | 25,329.0 | 21.1  | 22,251.0 |         |          |     |        |
| HI 3       | 20.8  | 28,062.9 | 20.9  | 26,903.1 | 21.2  | 22,046.9 |         |          |     |        |

SD, standard deviation; cp/μl, copies per microliter; LO, low spiking load; MED, medium spiking load; HI, high spiking load.

**Table S2.** Individual Ct values and percent recovery of WNV RNA in whole blood and urine specimens using original and optimized extraction protocols.

|                       | Rep 1<br>Ct | Rep 2<br>Ct | Rep 3<br>Ct | Expected<br>Ct | #Rep<br>within 1<br>Ct | %<br>recovery | Average<br>%<br>recovery |
|-----------------------|-------------|-------------|-------------|----------------|------------------------|---------------|--------------------------|
| WB LO                 | 34.2        | 34.4        | 34.2        | 32.4           | 0/3                    | 26            | 19                       |
| WB MED                | 29.1        | 29.2        | 29.0        | 26.4           | 0/3                    | 14            |                          |
| WB HI                 | 23.4        | 23.8        | 23.6        | 21.0           | 0/3                    | 16            |                          |
| WB optimized<br>LO    | 31.6        | 31.6        | 31.7        | 32.4           | 3/3                    | 163           | 133                      |
| WB optimized<br>MED   | 26.2        | 26.0        | 26.0        | 26.4           | 3/3                    | 125           |                          |
| WB optimized HI       | 20.8        | 20.8        | 20.8        | 21.0           | 3/3                    | 112           |                          |
| UR A LO               | 37.9        | 37.4        | 38.4        | 32.4           | 0/3**                  | 2             | 2                        |
| UR A MED              | 33.7        | 31.4        | 32.6        | 26.4           | 0/3**                  | 1             |                          |
| UR A HI               | 26.2        | 26.5        | 26.4        | 21.0           | 0/3**                  | 2             |                          |
| UR A optimized<br>LO  | 32.1        | 31.9        | 32.0        | 30.1*          | 3/3**                  | 25            | 27                       |
| UR A optimized<br>MED | 25.9        | 25.9        | 25.8        | 24.1*          | 3/3**                  | 28            |                          |
| UR A optimized<br>HI  | 20.7        | 20.6        | 20.4        | 18.7*          | 3/3**                  | 26            |                          |
| UR B LO               | 33.3        | 33.2        | 33.8        | 32.4           | 2/3                    | 49            | 52                       |
| UR B MED              | 27.4        | 27.3        | 27.4        | 26.4           | 3/3                    | 49            |                          |
| UR B HI               | 21.7        | 21.7        | 21.7        | 21.0           | 3/3                    | 59            |                          |
| UR B optimized<br>LO  | 30.7        | 30.8        | 30.6        | 30.1*          | 3/3                    | 65            | 58                       |
| UR B optimized<br>MED | 24.8        | 24.8        | 24.8        | 24.1*          | 3/3                    | 60            |                          |
| UR B optimized<br>HI  | 19.5        | 19.5        | 19.9        | 18.7*          | 2/3                    | 50            |                          |

\* Expected Ct decreased by 2.3 due to 5-fold higher volume of spiked specimen (1 ml vs. 0.2 ml).

\*\* Number of biological replicates within 2 Ct units from expected Ct.

Rep, biological replicate; WB, whole blood; UR, urine; LO, low spiking load; MED, medium spiking load; HI, high spiking load.
